# Supplementary material for: Vertical profile of atmospheric dimethyl sulfide in the ArcticSpring and Summer
Source: Copernicus journal article supplement (doi:10.5194/acp-2017-33), 2017-01-16
Supplement: Supplementary file [file acp-2017-33-AC1-supplement.zip]

# **Vertical profile of atmospheric dimethyl sulfide in the Arctic Spring and Summer**

**Roghayeh Ghahremaninezhad<sup>1</sup>, Ann-Lise Norman<sup>1</sup>, Betty Croft<sup>2</sup>, Randall V. Martin<sup>2</sup>, Jeffrey R. Pierce<sup>3</sup>, Julia Burkart<sup>4</sup>, Ofelia Rempillo<sup>1</sup>, Heiko Bozem<sup>5</sup>, Daniel Kunkel<sup>5</sup>, Jennie L. Thomas<sup>6</sup>, Amir A. Aliabadi<sup>7</sup>, Gregory R. Wentworth<sup>4</sup>, Maurice Levasseur<sup>8</sup>, Ralf M. Staebler<sup>9</sup>, Sangeeta Sharma<sup>9</sup> and W. Richard Leaitch<sup>9</sup>**

[1] Department of Physics and Astronomy, University of Calgary, Calgary, Canada

[2] Department of Physics and Atmospheric Science, Dalhousie University, Halifax, Canada

[3] Department of Atmospheric Science, Colorado State University, Fort Collins, USA

[4] Department of Chemistry, University of Toronto, Toronto, Canada

[5] Institute of Atmospheric Physics, University of Mainz, Mainz, Germany

[6] Sorbonne Universités, UPMC Univ. Paris 06, Université Versailles St-Quentin, CNRS/INSU, UMR8190, LATMOS-IPSL, Paris, France

[7] Environmental Engineering Program, School of Engineering, University of Guelph, Guelph, Canada

[8] Department of Biology, Laval University, Quebec, Canada

[9] Environment and Climate Change Canada, Toronto, Canada

Corresponding author: Ann-Lise Norman ([alnorman@ucalgary.ca](mailto:alnorman@ucalgary.ca))

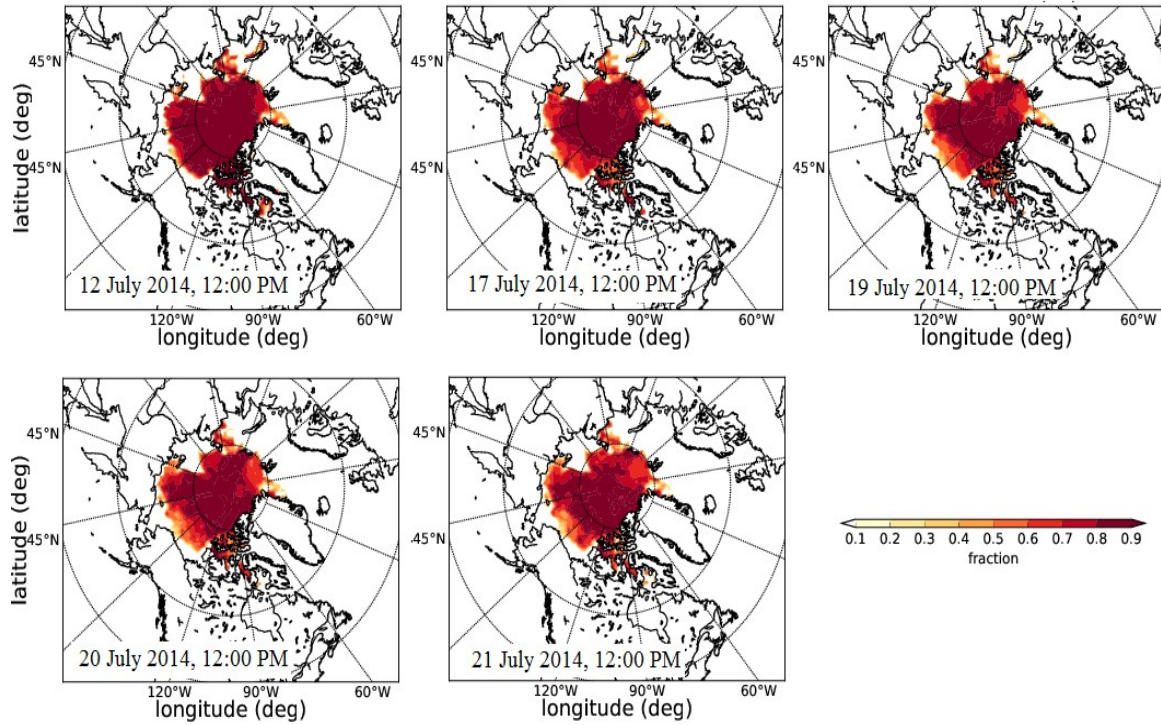

Figure S1. Distribution of the sea ice fraction over the Arctic for July 2014 flights. The fraction in each grid box specifies how much of the area was covered with sea ice. The data is taken from the operational analysis of the ECMWF model which is also used as meteorological input for the FLEXPART simulations.

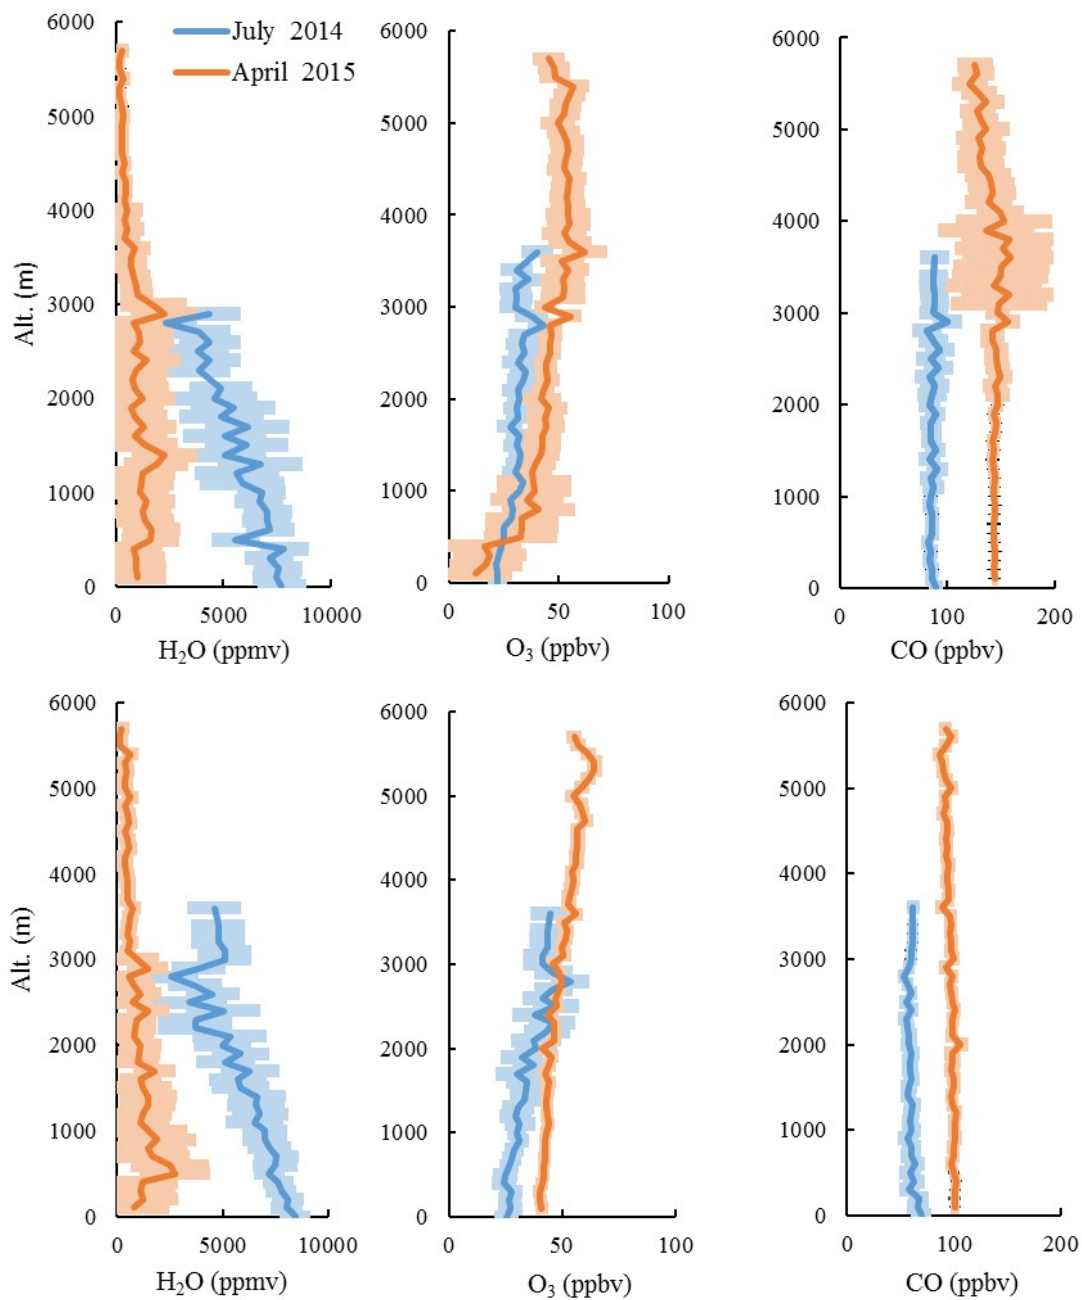

Figure S2. Average vertical profile of  $\text{H}_2\text{O}(\text{g})$  and  $\text{O}_3$  and  $\text{CO}$  during July 2014 (orange) and April 2015 (blue). Upper panels indicate and lower panels indicate measurements and GEOS-Chem results, respectively. Shadows show standard deviations.

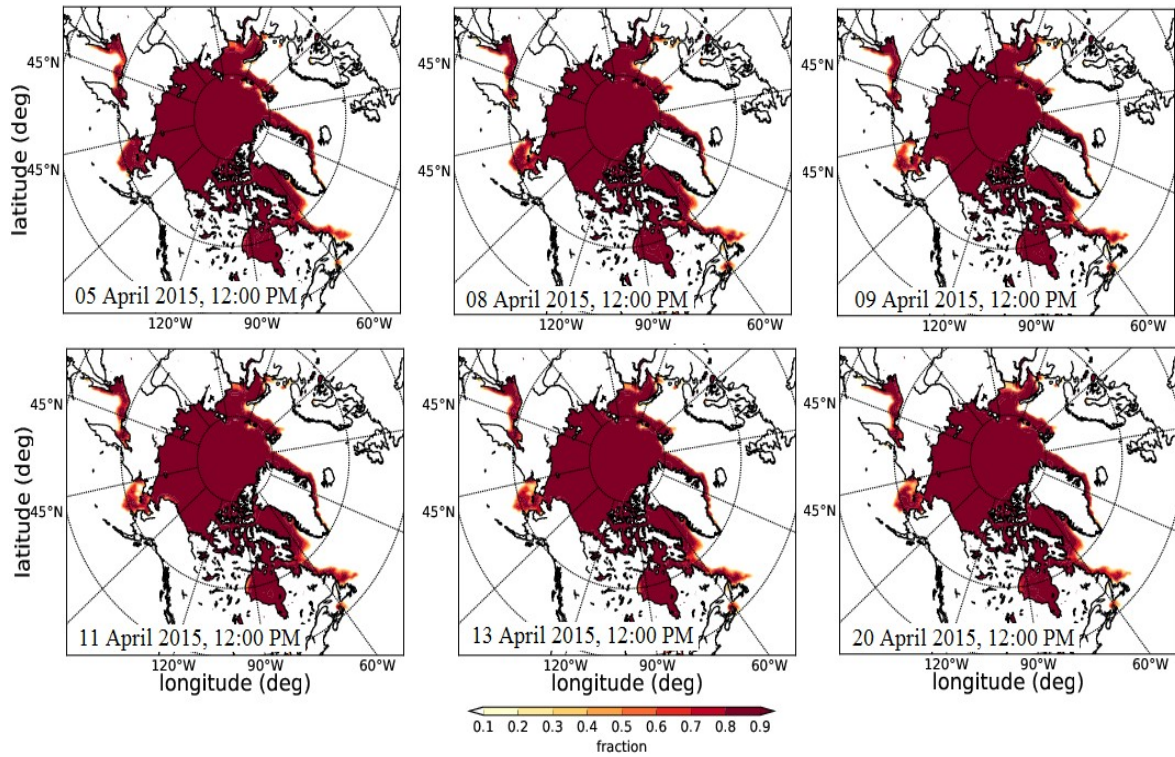

Figure S3. Distribution of the sea ice fraction over the Arctic for April 2015 flights. The fraction in each grid box specifies how much of the area was covered with sea ice. The data is taken from the operational analysis of the ECMWF model which is also used as meteorological input for the FLEXPART simulations.
